# Supplementary material
Source: publisher figshare collection journal article supplement (https://acs.figshare.com/ndownloader/files/6898244)

# Supporting Information

## **Ab Initio Investigation of the Ground States of F<sub>2</sub>P(S)N, F<sub>2</sub>PNS, and F<sub>2</sub>PSN**

Jiwon Moon, Heehyun Baek, and Joonghan Kim\*

Department of Chemistry, The Catholic University of Korea, Bucheon 14662,

Republic of Korea

**Figure S1.** The active orbitals of CAS(12,10) for  $\text{F}_2\text{P}(\text{S})\text{N}$ .

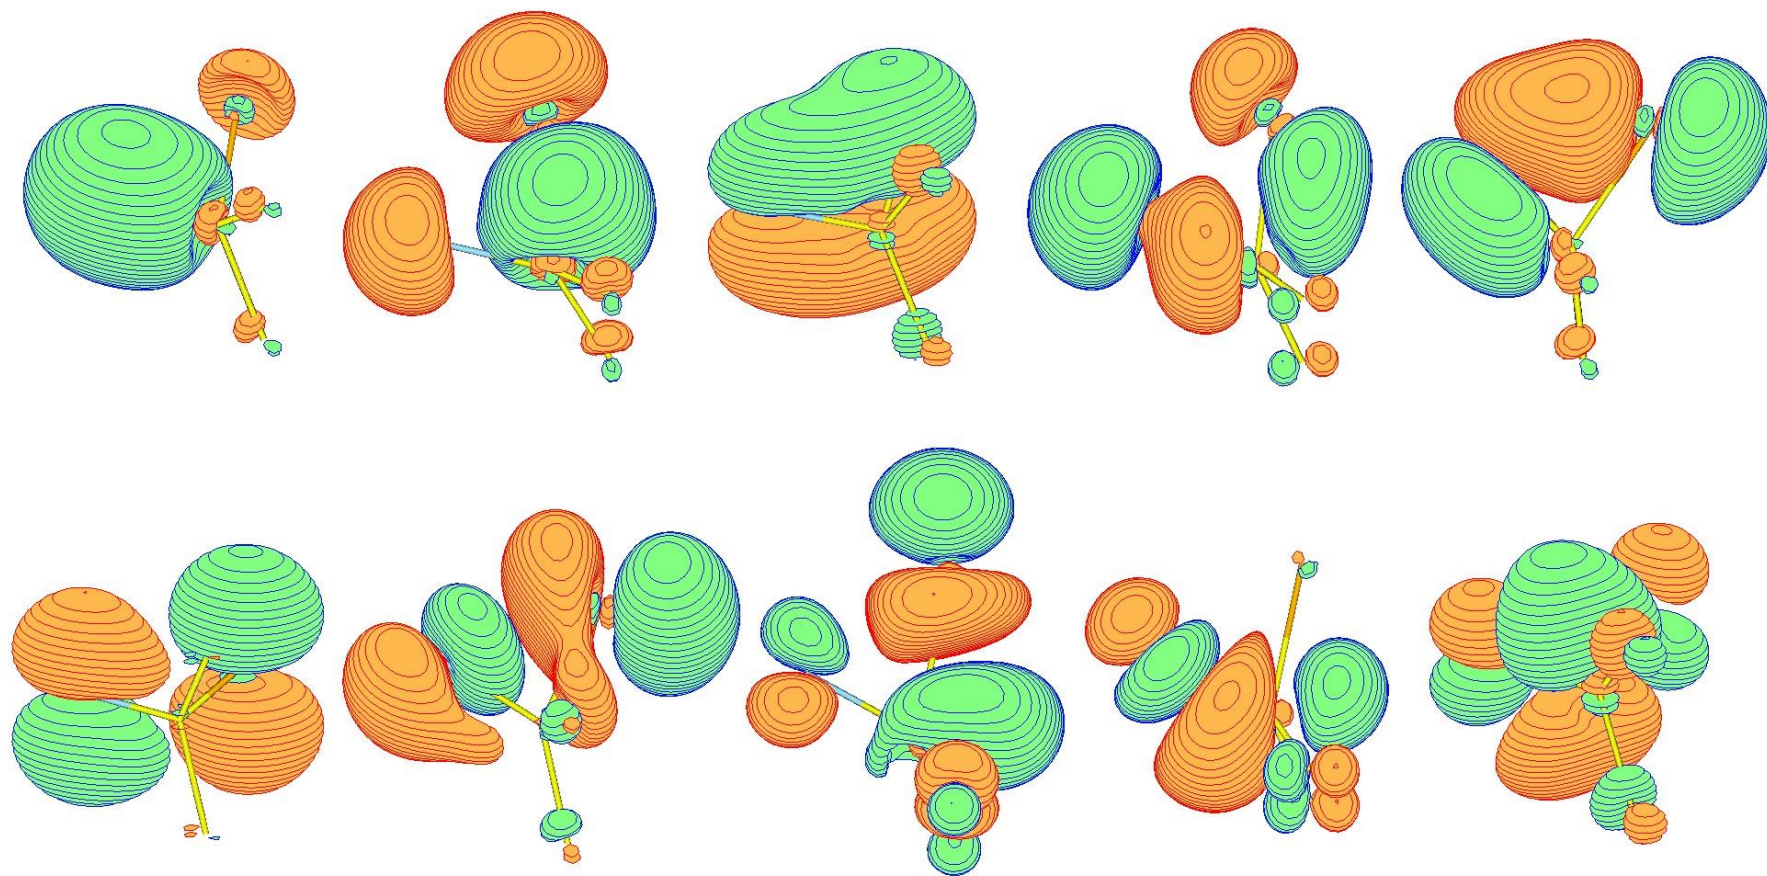

**Figure S2.** The active orbitals of CAS(12,10) for F<sub>2</sub>PNS.

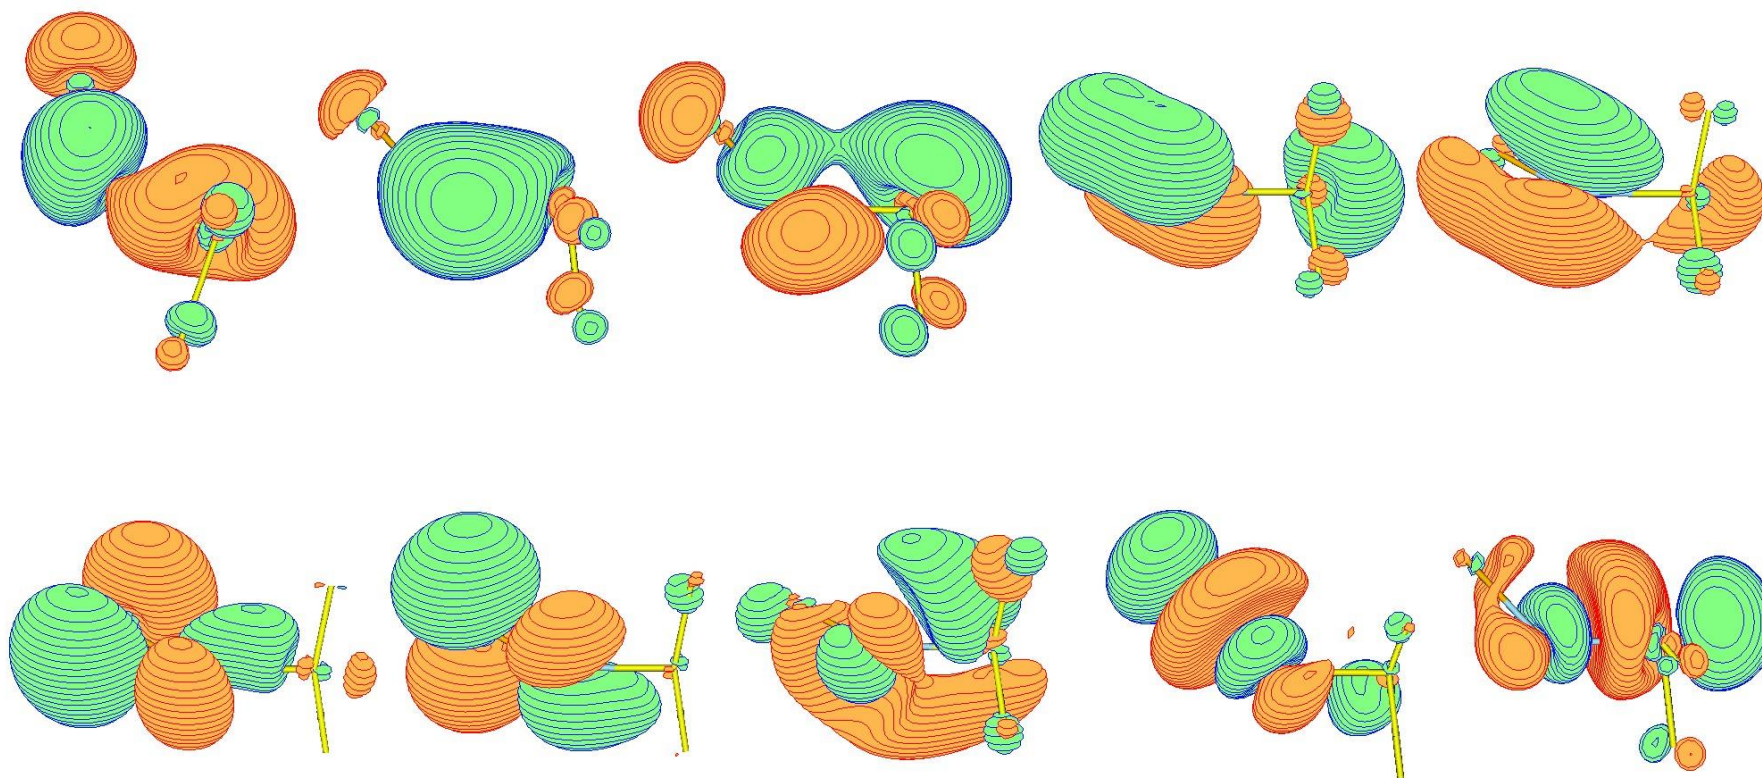

**Figure S3.** The active orbitals of CAS(10,9) for F<sub>2</sub>PSN.

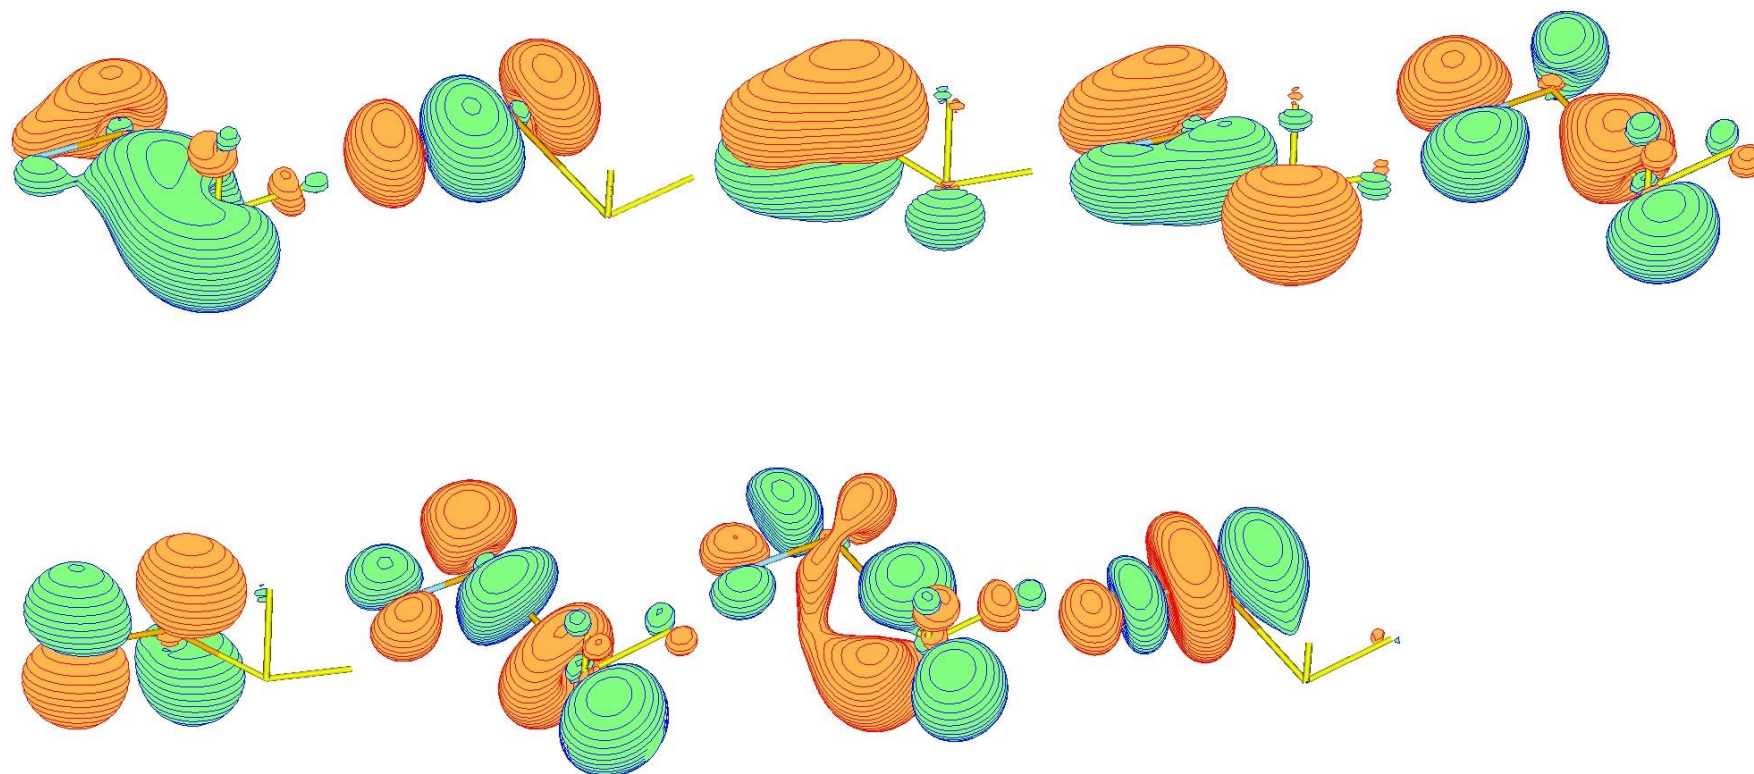

**Table S1.** The harmonic and anharmonic vibrational frequencies (in cm<sup>-1</sup>) of the singlet state of F<sub>2</sub>PSN calculated by DFT method

| Vibration<br><br>Mode          | B3LYP        |              | B3PW91       |               | APFD         |               | PBE0         |              |
|--------------------------------|--------------|--------------|--------------|---------------|--------------|---------------|--------------|--------------|
|                                | harmonic     | anharmonic   | harmonic     | anharmonic    | harmonic     | anharmonic    | harmonic     | anharmonic   |
| PF <sub>2</sub> rocking        | 14.8         | 182.5        | 10.2         | 54.0 <i>i</i> | 10.4         | 84.2 <i>i</i> | 2.7          | 1179.7       |
| PF <sub>2</sub> wagging        | 137.0        | 143.4        | 138.0        | 109.0         | 109.6        | 80.5          | 141.6        | 16.8         |
| PF <sub>2</sub> twisting       | 190.0        | 189.6        | 197.9        | 197.3         | 218.0        | 200.4         | 208.9        | 213.2        |
| <b>PS stretch.</b>             | <b>140.3</b> | <b>150.5</b> | <b>143.4</b> | <b>153.5</b>  | <b>192.7</b> | <b>169.3</b>  | <b>150.1</b> | <b>163.9</b> |
| PF <sub>2</sub> scissoring     | 346.6        | 344.8        | 351.5        | 344.1         | 358.5        | 351.1         | 358.0        | 340.7        |
| <b>PSN bend.</b>               | <b>467.5</b> | <b>462.7</b> | <b>480.1</b> | <b>468.2</b>  | <b>470.6</b> | <b>415.4</b>  | <b>496.4</b> | <b>470.0</b> |
| PF <sub>2</sub> asym. stretch. | 796.7        | 787.6        | 812.0        | 801.5         | 824.9        | 813.1         | 825.6        | 818.1        |
| PF <sub>2</sub> sym. stretch.  | 808.3        | 798.3        | 821.9        | 811.0         | 832.0        | 822.2         | 835.2        | 827.1        |
| SN stretch.                    | 1184.8       | 1172.7       | 1201.1       | 1177.8        | 1198.9       | 1179.5        | 1203.6       | 1187.8       |



**Figure S4.** The active orbitals of CAS(14,11) for  $\text{F}_2\text{P}(\text{S})\text{N}$  in the  $T_v$ s calculation.

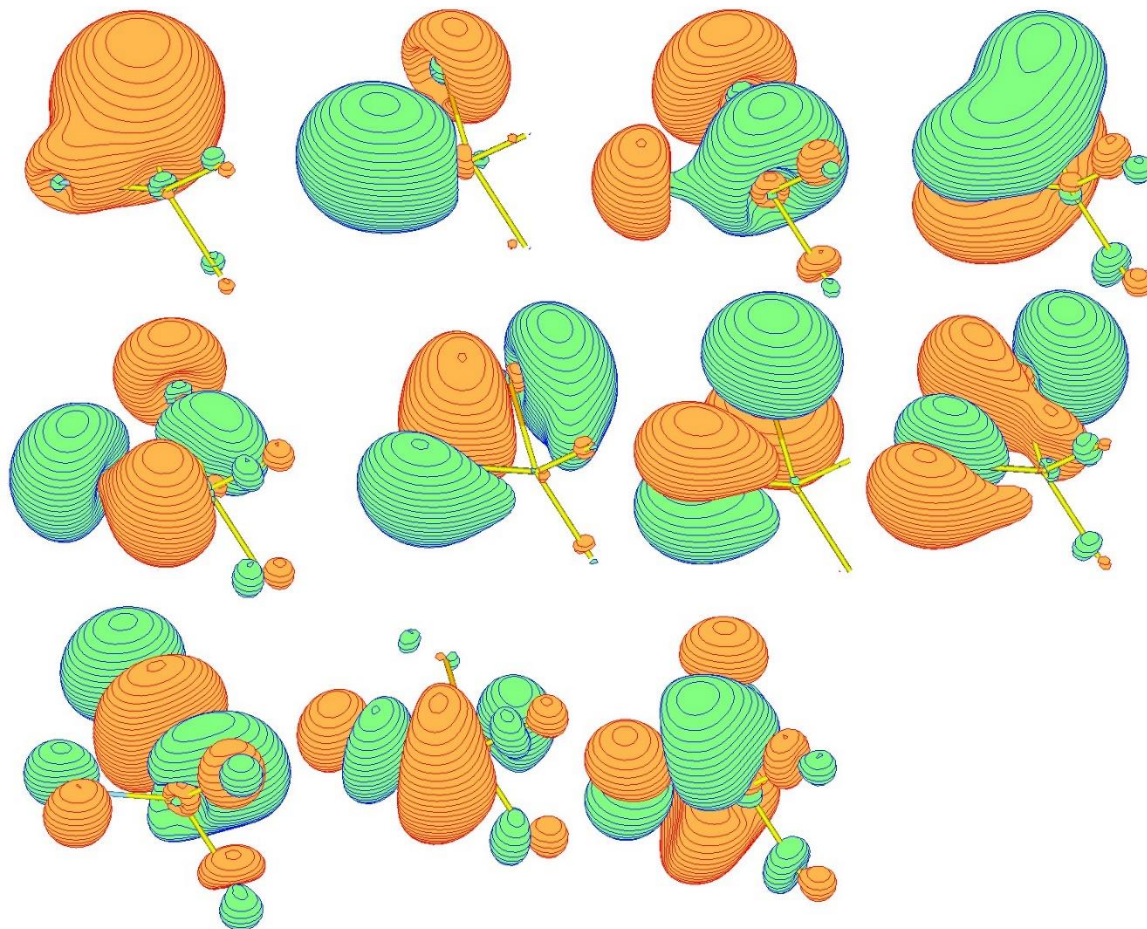

**Figure S5.** The active orbitals of CAS(14,11) for F<sub>2</sub>PNS in the T<sub>v</sub>s calculation.

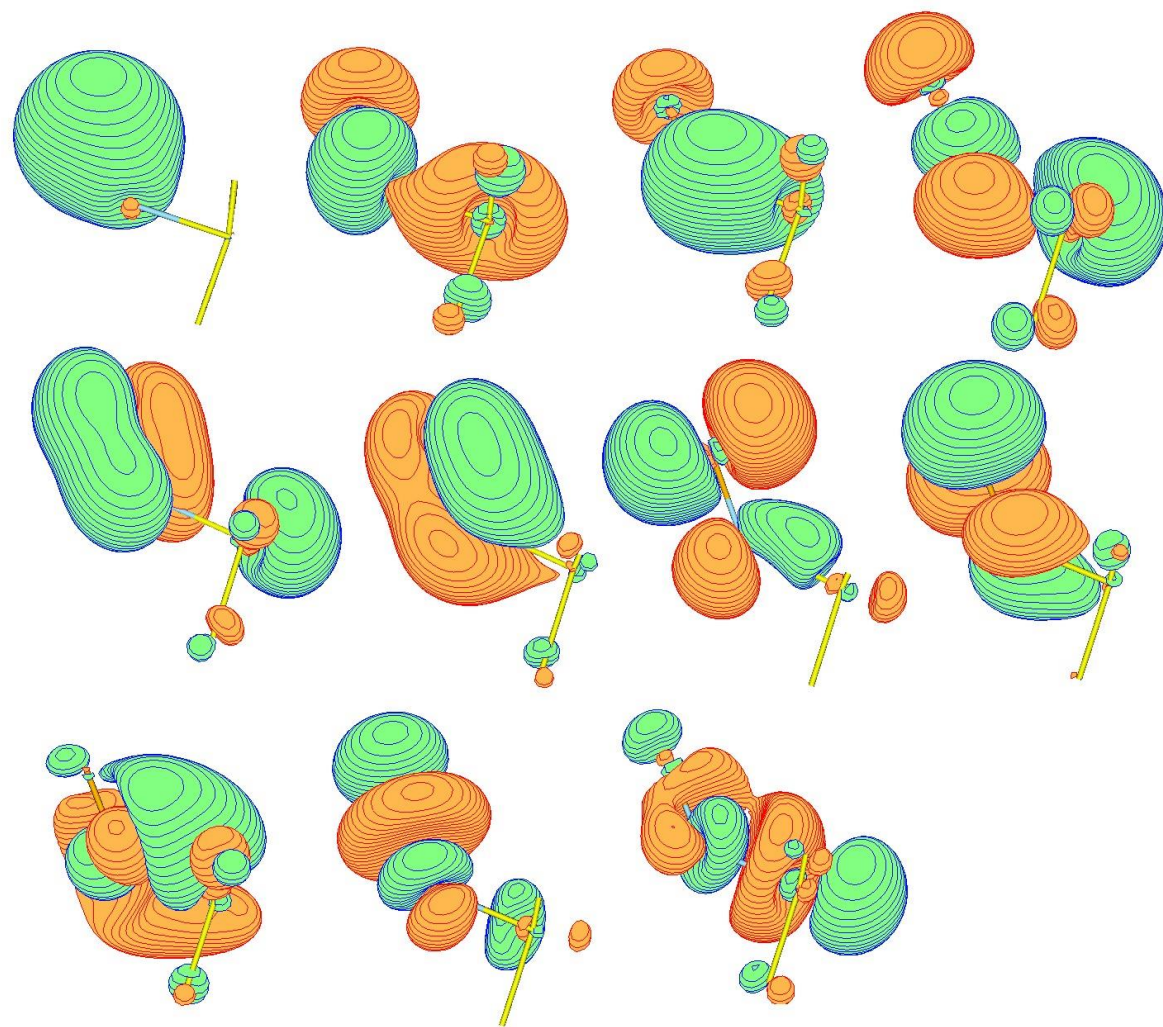

**Figure S6.** The active orbitals of CAS(14,11) for F<sub>2</sub>PSN in the T<sub>v</sub>s calculation.

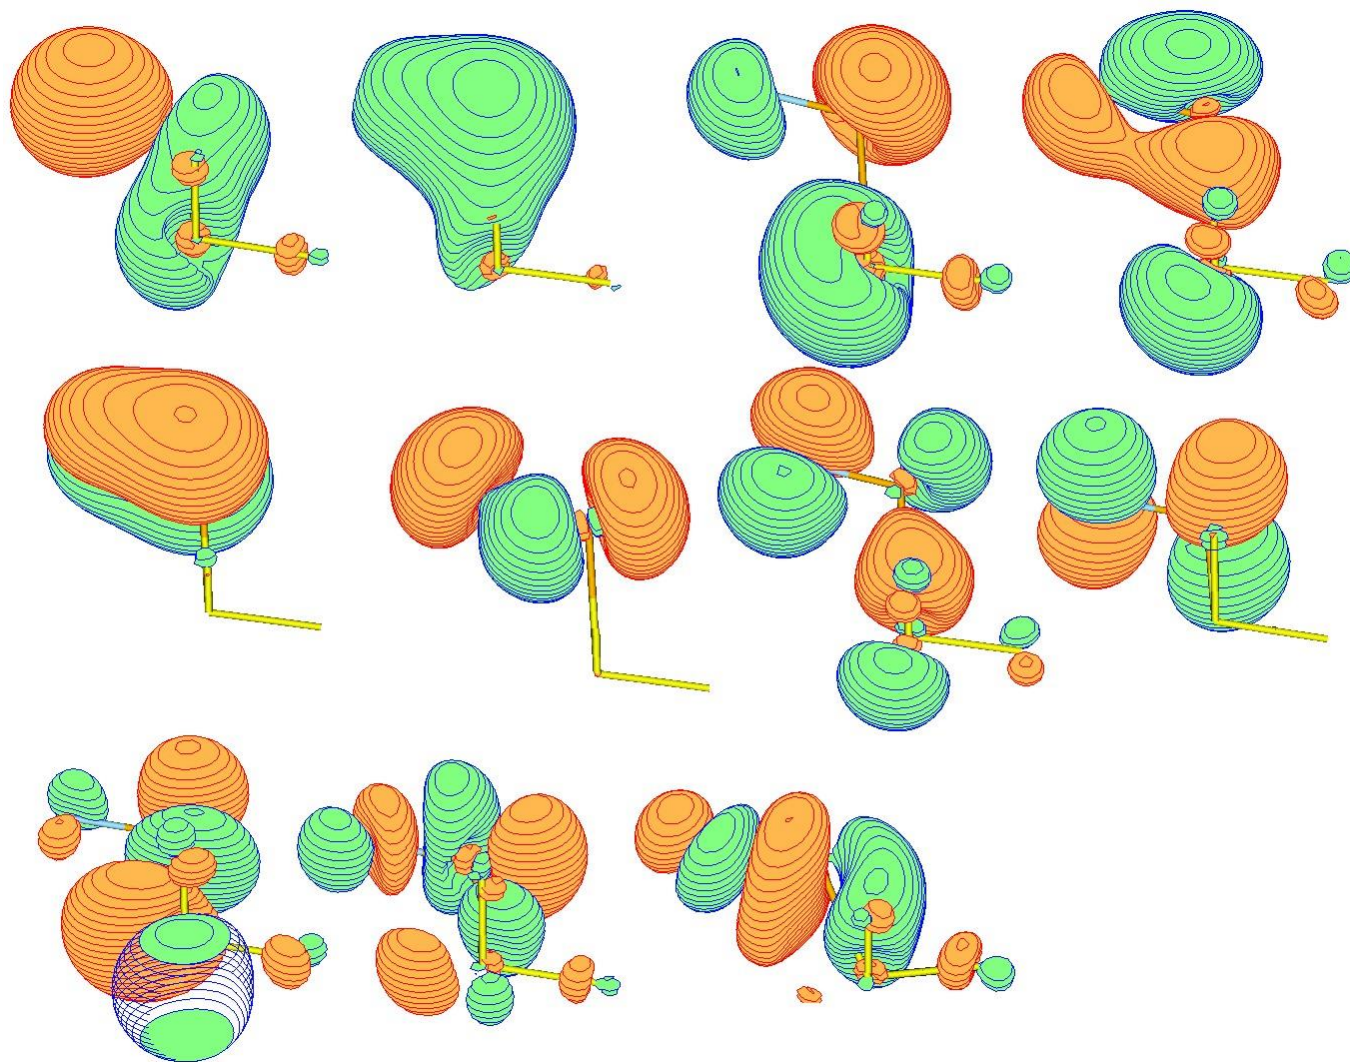



**Figure S7.** The calculated UV-vis spectrum of  $F_2P(S)N$ ,  $F_2PNS$ , and  $F_2PSN$  based on the MS-CASPT2 calculations. The absorption peaks were represented by Gaussian functions. The standard deviation of 0.4 eV was used for Gaussian function.

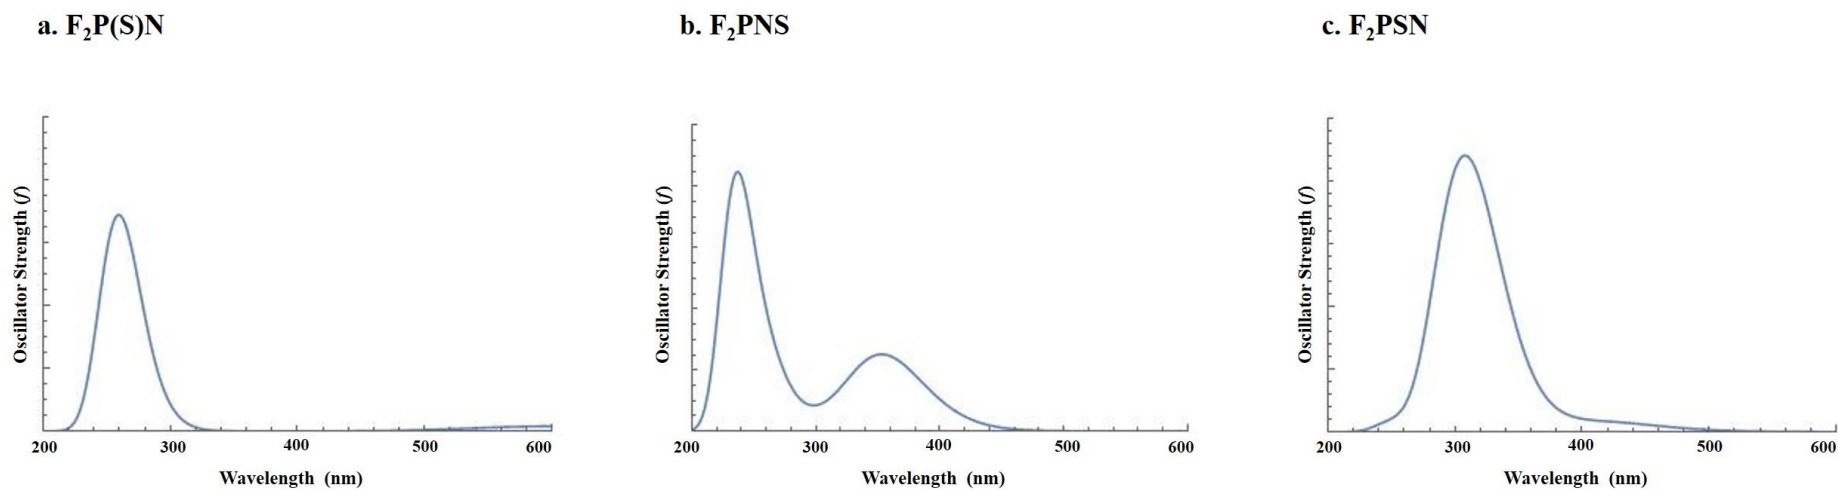

Supplement: Supplementary file 1 [file 6898244]
